# Supplementary material for: Enhanced reduction of COD in water associated with natural gas production using iron-based nanoparticles
Source: Royal Society of Chemistry journal article supplement (doi:10.1039/d4ra00888j), 2024-01-01
Supplement: d4ra00888j1.pdf [file d4ra00888j1.pdf]

## Enhanced reduction of COD in water associated with natural gas production using iron-based nanoparticles

Moataz Elsaeed Selim<sup>[a]</sup>, Magdi E Khalifa<sup>[a]</sup>, Fawaz A Agizah<sup>[b]</sup>, Eman M. Mostafa<sup>[c]</sup>, and Fathi S. Awad<sup>[a,d]</sup> \*

<sup>[a]</sup> Chemistry Department, Faculty of Science, Mansoura University, Mansoura 35516, Egypt.

<sup>[b]</sup> Rashid Petroleum Company, Cairo, Egypt.

<sup>[c]</sup> Production department, Egyptian Petroleum Research Institute, Cairo, Egypt.

<sup>[d]</sup> Chemistry Department, Faculty of Science, New Mansoura University, New Mansoura City, 35712, Egypt.

### Supporting Information

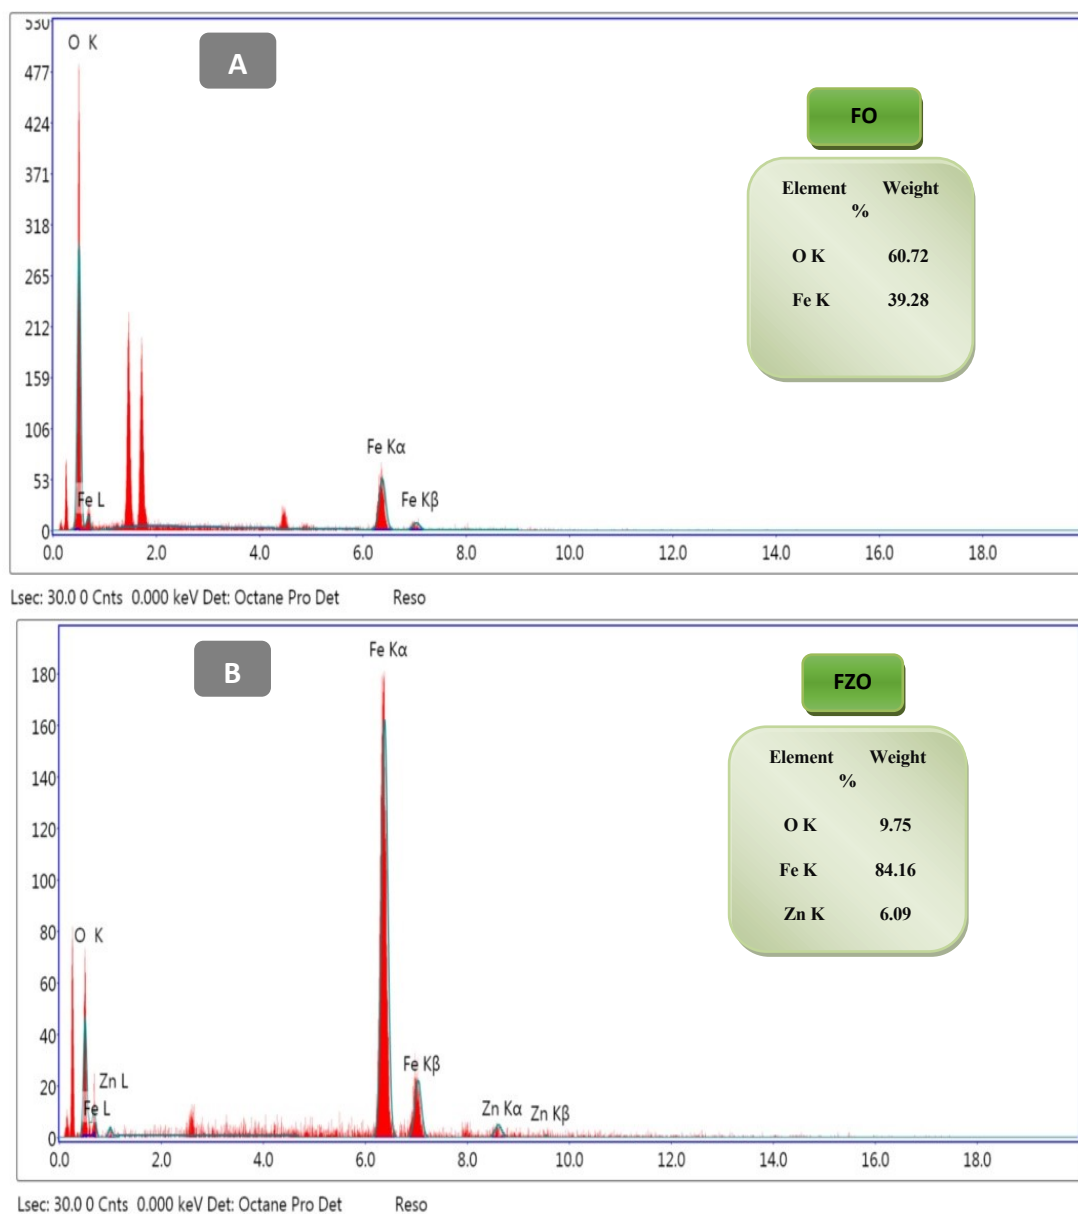

Figure S1: EDX analysis of iron oxide (FO) (A), and iron zinc oxide (FZO) (B).

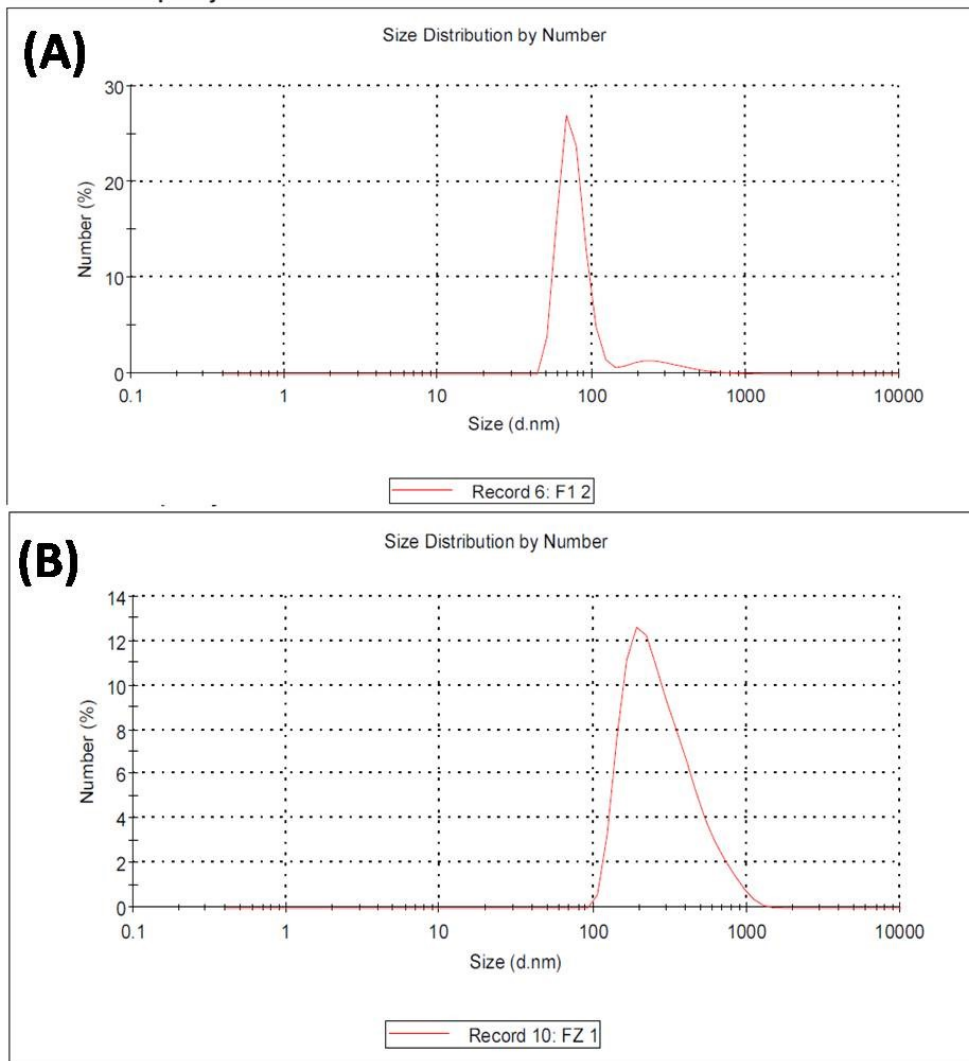

Figure S2: DLS analysis of iron oxide (FO) (A), and iron zinc oxide (FZO) (B).

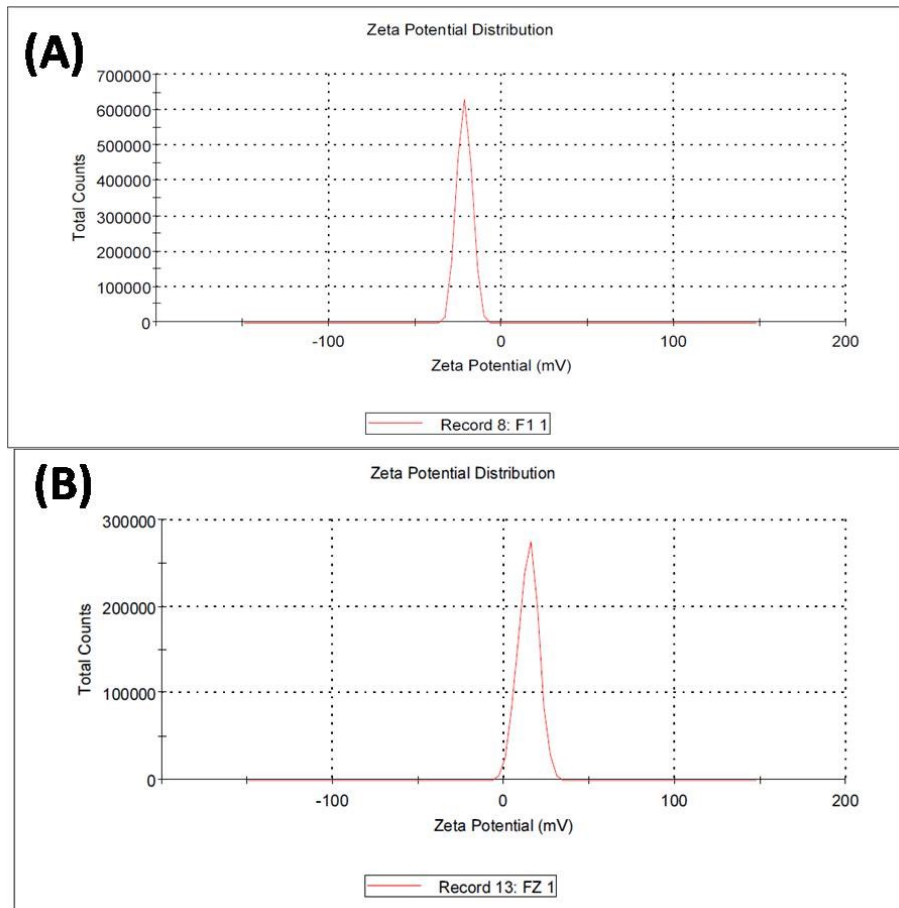

Figure S3: Zeta potential analysis of iron oxide (FO) (A), and iron zinc oxide (FZO) (B).

Table S1: The effect of pH upon %COD reduction at different dosage (1.5 g/L, 3 g/L, 4.5 g/L) of nanoparticles.

| Dose (g/l) | Samples    | pH (3)    |           | pH (4)    |           | pH (6)    |           | pH (8)    |           | pH (10)   |           |
|------------|------------|-----------|-----------|-----------|-----------|-----------|-----------|-----------|-----------|-----------|-----------|
|            |            | COD (ppm) | Removal % |
| Blank      |            | 3,547     |           | 3,547     |           | 4,732     |           | 3,547     |           | 3,547     |           |
| 1.5 g/l    | <u>FO</u>  | 3,208     | 9.55      | 3,168     | 10.69     | 4,118     | 12.97     | 3,068     | 13.51     | 3,049     | 14.04     |
|            | <u>FZO</u> | 3,217     | 9.30      | 3,077     | 13.24     | 3,986     | 21.13     | 2,921     | 17.66     | 3,044     | 14.18     |
|            | <u>FVO</u> | 3,509     | 1.07      | 3,006     | 15.25     | 3,448     | 27.14     | 2,899     | 18.27     | 3,213     | 9.40      |
| Blank      |            | 3,547     |           | 3,547     |           | 4,732     |           | 3,547     |           | 3,547     |           |
| 3 g/l      | <u>FO</u>  | 2,865     | 19.23     | 2,820     | 20.50     | 3,497     | 26.10     | 2,601     | 26.66     | 2,582     | 27.20     |
|            | <u>FZO</u> | 2,909     | 17.99     | 2,756     | 22.29     | 3,047     | 35.61     | 2,694     | 24.06     | 2,936     | 17.23     |
|            | <u>FVO</u> | 2,878     | 18.86     | 2,621     | 26.10     | 2,736     | 42.18     | 2,409     | 32.07     | 2,768     | 21.96     |
| Blank      |            | 3,547     |           | 3,547     |           | 4,732     |           | 3,547     |           | 3,547     |           |
| 4.5 g/l    | <u>FO</u>  | 2,686     | 24.27     | 2,742     | 22.70     | 3,719     | 19.70     | 2,698     | 23.92     | 2,549     | 28.13     |
|            | <u>FZO</u> | 2,532     | 28.62     | 2,449     | 30.95     | 3,270     | 30.89     | 2,328     | 34.36     | 2,374     | 33.10     |
|            | <u>FVO</u> | 2,831     | 20.19     | 2,641     | 25.53     | 3,816     | 19.35     | 2,683     | 24.35     | 2,506     | 29.34     |

Table S2: The effect of nanomaterials dosage (1.5, 3, 4.5 g/L) upon %COD reduction at pH 6.

| Dose (g/L) | Samples    | pH (6)    |           |
|------------|------------|-----------|-----------|
|            |            | COD (ppm) | Removal % |
| Blank      |            | 4,732     |           |
| 1.5        | <u>FO</u>  | 4,118     | 12.97     |
|            | <u>FZO</u> | 3,986     | 21.13     |
|            | <u>FVO</u> | 3,448     | 27.14     |
| Blank      |            | 4,732     |           |
| 3          | <u>FO</u>  | 3,497     | 26.10     |
|            | <u>FZO</u> | 3,047     | 35.61     |
|            | <u>FVO</u> | 2,736     | 42.18     |
| Blank      |            | 4,732     |           |
| 4.5        | <u>FO</u>  | 3,719     | 19.70     |
|            | <u>FZO</u> | 3,270     | 30.89     |
|            | <u>FVO</u> | 3,816     | 19.35     |

Table S3: The effect of temperatures (25 °C, 30°C, 40°C, 50°C and 60 °C) upon %COD reduction at dose (3 g/L) of nanomaterials

| Dose (g/l) | Samples    | 25 °C     |           | 30 °C     |           | 40 °C     |           | 50 °C     |           | 60 °C     |           |
|------------|------------|-----------|-----------|-----------|-----------|-----------|-----------|-----------|-----------|-----------|-----------|
|            |            | COD (ppm) | Removal % |
| Blank      |            | 4,732     |           | 3,547     |           |           |           |           |           |           |           |
| 3 g/l      | <u>FO</u>  | 3,497     | 26.10     | 2,784     | 22.06     | 2,825     | 20.36     | 2,847     | 19.73     | 3,062     | 13.67     |
|            | <u>FZO</u> | 3,047     | 35.61     | 2,610     | 26.41     | 2,929     | 17.42     | 2,997     | 15.51     | 3,107     | 12.40     |
|            | <u>FVO</u> | 2,736     | 42.18     | 2,366     | 33.29     | 2,997     | 15.50     | 3,109     | 12.35     | 3,221     | 9.19      |

Table S4: The effect of different commercial products upon %COD reduction at doses (1.5, 3.0, 4.5, 100.0, 200.0, 300 g/L)

| <b>Materials</b>    | <b>Substance (RedOxy)</b> | <b>Substance (Oxy)</b> |
|---------------------|---------------------------|------------------------|
| <b>Dosage (g/L)</b> | <b>Removal %</b>          | <b>Removal %</b>       |
| <b>Blank</b>        | <b>4,732</b>              |                        |
| <b>1.5</b>          | <b><u>0</u></b>           | <b><u>0</u></b>        |
| <b>3.0</b>          | <b><u>0</u></b>           | <b><u>0</u></b>        |
| <b>4.5</b>          | <b><u>0</u></b>           | <b><u>0</u></b>        |
| <b>100.0</b>        | <b><u>15.17</u></b>       | <b><u>0</u></b>        |
| <b>200.0</b>        | <b><u>22.66</u></b>       | <b><u>0</u></b>        |
| <b>300.0</b>        | <b><u>22.12</u></b>       | <b><u>0</u></b>        |

**Table S5: The components of oilfield water**

| Analysis              | unit          | Results | Analysis            | unit           | Results                          | Constituents     | unit          | Results          | Constituents       | unit          | Results  |
|-----------------------|---------------|---------|---------------------|----------------|----------------------------------|------------------|---------------|------------------|--------------------|---------------|----------|
| <b>TDS</b>            | <b>(mg/l)</b> | 30655   | <b>TSS HCl%</b>     | <b>(mg/l)</b>  | 13.2 % organic                   | <b>Lithium</b>   | <b>(mg/l)</b> | 0.41             | <b>Fluoride</b>    | <b>(mg/l)</b> | 53.77    |
|                       |               |         |                     |                | 86.7 % inorganic                 |                  |               |                  |                    |               |          |
| <b>Salinity</b>       |               | 28723   | <b>Density</b>      |                | 1.01139                          | <b>Sodium</b>    |               | 10480.2          | <b>Chloride</b>    |               | 17407.86 |
| <b>Alkalinity</b>     |               | 417.8   | <b>SP Gr</b>        |                | 1.01239                          | <b>Ammonium</b>  |               | 169.12           | <b>Bromide</b>     |               | 195.98   |
| <b>Total hardness</b> |               | 2327.5  | <b>PH</b>           |                | 6                                | <b>Potassium</b> |               | 179.92           | <b>Nitrate</b>     |               | 97.45    |
| <b>DO</b>             |               | 3.68    | <b>Conductivity</b> |                | (mohs/cm) 4.6 x 10 <sup>-2</sup> | <b>Magnesium</b> |               | 229.7            | <b>Nitrite</b>     |               | Nil      |
| <b>BOD</b>            |               | 346.4   | <b>Resistivity</b>  | (ohm-m) 0.2174 | <b>Calcium</b>                   | 553.29           |               | <b>Phosphate</b> | Nil                |               |          |
| <b>TSS</b>            |               | 65.34   | <b>COD</b>          | <b>(mg/l)</b>  | <b>Strontium</b>                 | 13.28            |               | <b>Sulfate</b>   | 703.38             |               |          |
| <b>Total BTX</b>      |               | 11.209  | <b>Toluene</b>      |                | 3.429                            | <b>Barium</b>    |               | 2.71             | <b>Hydroxide</b>   |               | Nil      |
| <b>Benzene</b>        |               | 5.22    | <b>Xylenes</b>      |                | 0.55                             | <b>Iron</b>      |               | 29.9             | <b>Carbonate</b>   |               | Nil      |
| <b>Ethyl Benzene</b>  |               | 0.63    | <b>p, m-xylene</b>  |                | 1.38                             | <b>Copper</b>    |               | 0.06             | <b>Bicarbonate</b> |               | 509.55   |
| <b>Oil Content</b>    |               | 15.5    |                     |                |                                  |                  |               |                  |                    |               |          |

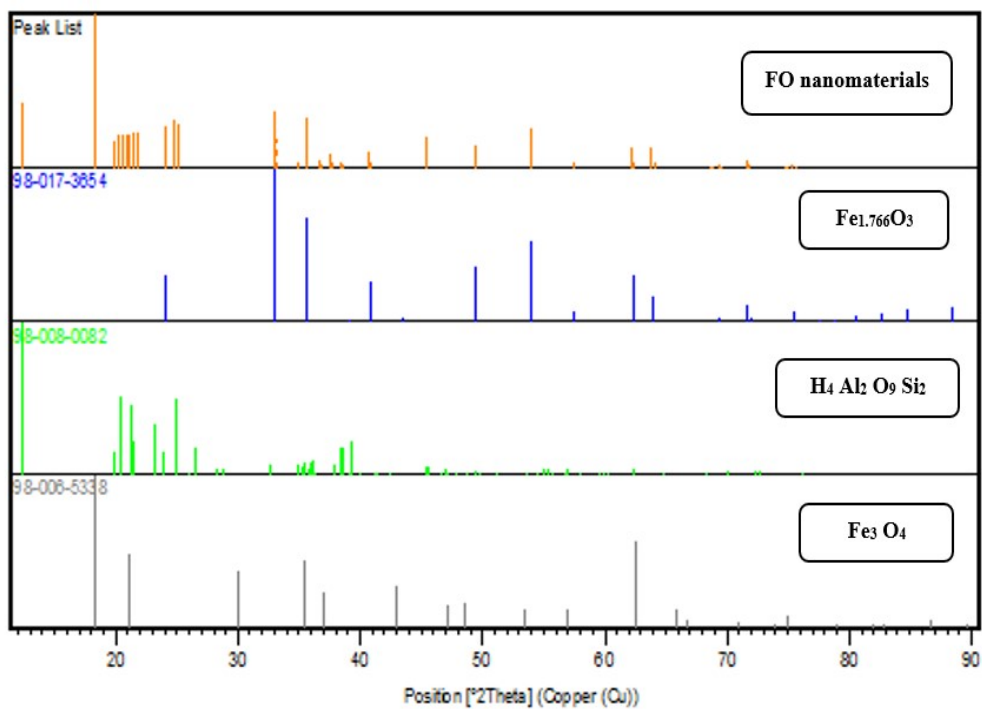

Figure S4: The ICSD of compounds existed in FO nanomaterials

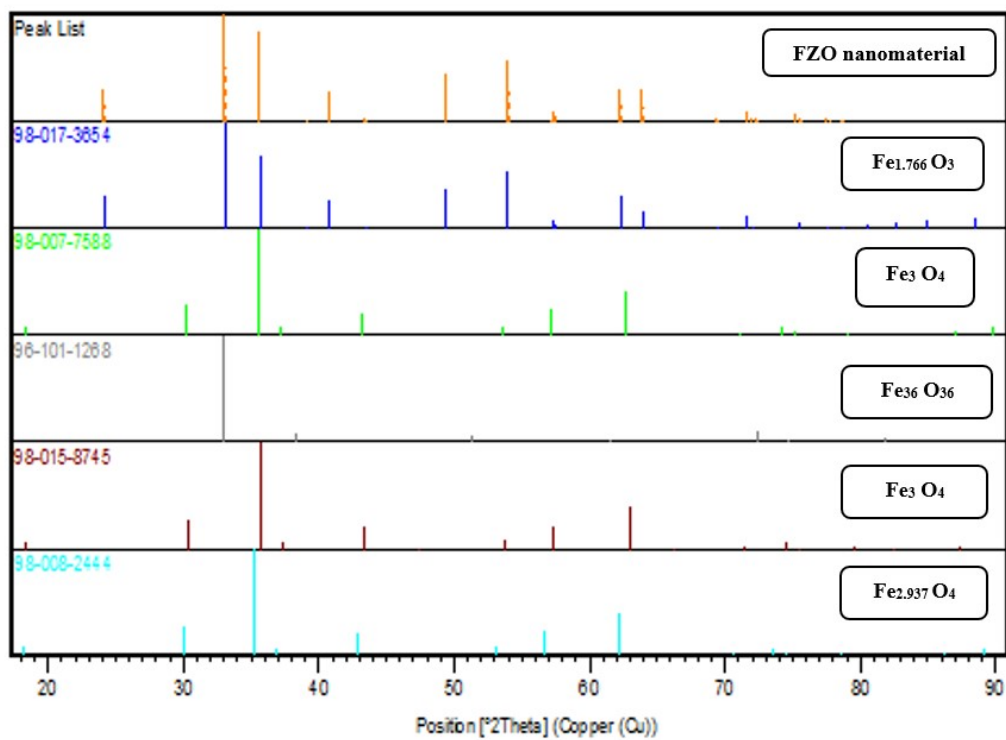

Figure S5: The ICSD of compounds existed in FZO nanomaterials

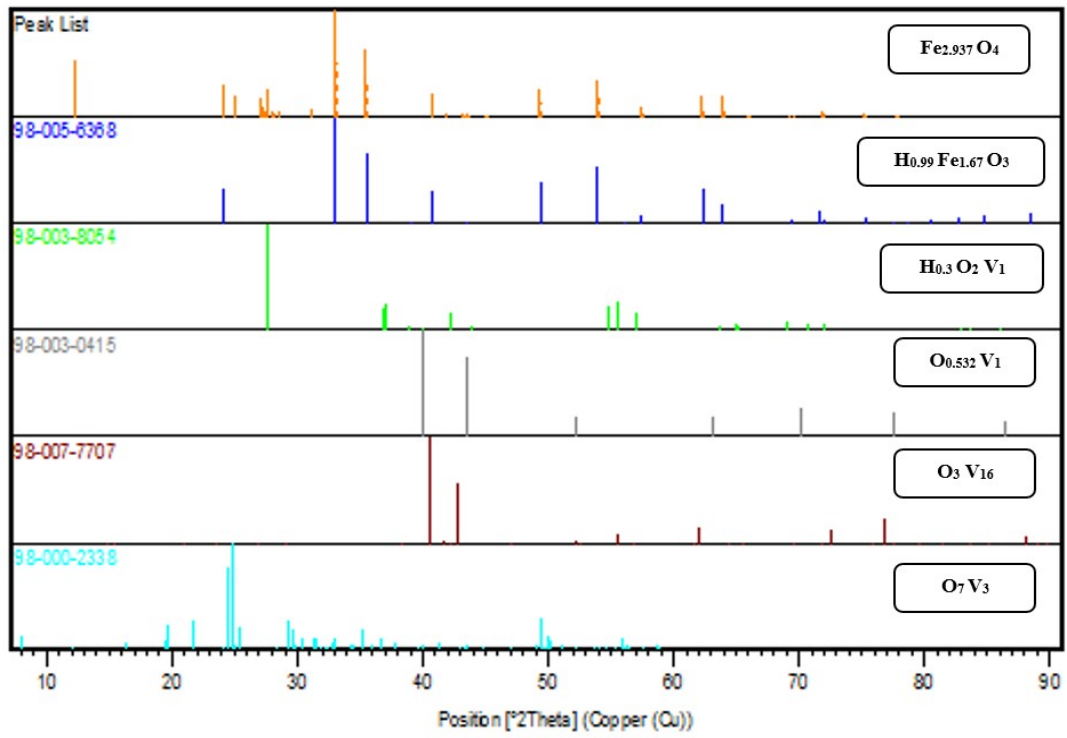

Figure S6: The ICSD of compounds existed in FZO nanomaterials
